# Supplementary material for: Design of thermoresponsive hydrogels by controlling the chemistry and imprinting of drug molecules within the hydrogel for enhanced loading and smart delivery of drugs
Source: Royal Society of Chemistry journal article supplement (doi:10.1039/d0me00097c), 2021-01-01
Supplement: d0me00097c1.pdf [file d0me00097c1.pdf]

Electronic Supplementary Information

**Design of thermoresponsive hydrogels by controlling the chemistry  
and imprinting of drug molecules within the hydrogel for  
enhanced loading and smart delivery of drugs**

Sang-Yu Park<sup>a,b†</sup>, Seong Yeol Kim<sup>b†</sup>, Ji-Hye Kang<sup>a,b</sup>, Han-Sem Kim<sup>a,b</sup> and Ueon Sang Shin<sup>a,b\*</sup>

<sup>a</sup>Department of Nanobiomedical Science & BK21 PLUS NBM Global Research Center for Regenerative Medicine, Dankook University, Chungnam, Cheonan, 330-714, Korea.

<sup>b</sup>Institute of Tissue Regeneration Engineering (ITREN), Dankook University, Chungnam, Cheonan, 330-714, Korea.

\*Corresponding author. Tel.: +82 41 550 3691, Fax.: +82 41 559 7911, E-mail address: usshin12@dankook.ac.kr.

<sup>†</sup>Sang-Yu Park and Seong Yeol Kim contributed equally to this work.

| Sample name | Drug<br>(mmol) | NIPAAm<br>(mmol) | AAc<br>(mmol) | DVB<br>(mmol) | DW<br>( $\mu$ L) |
|-------------|----------------|------------------|---------------|---------------|------------------|
| NIH         | 0              | 1.07             | 0.06          | 0.06          | 500              |
| ACVIH       | 0.0119         | 1.07             | 0.06          | 0.06          | 500              |
| DCFIH       | 0.0119         | 1.07             | 0.06          | 0.06          | 500              |
| DXRIH       | 0.0119         | 1.07             | 0.06          | 0.06          | 500              |

**Table S1.** Molecularly imprinted hydrogel samples prepared with different feeding amounts of drug templates.

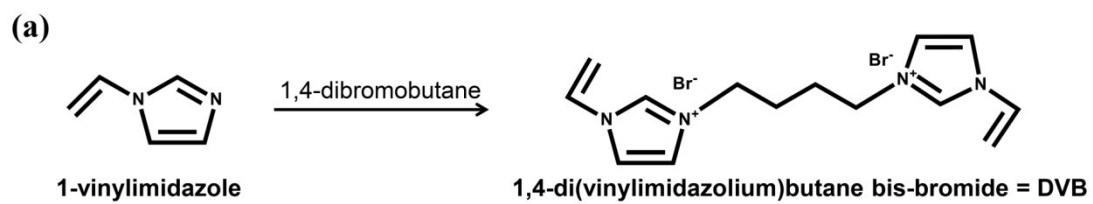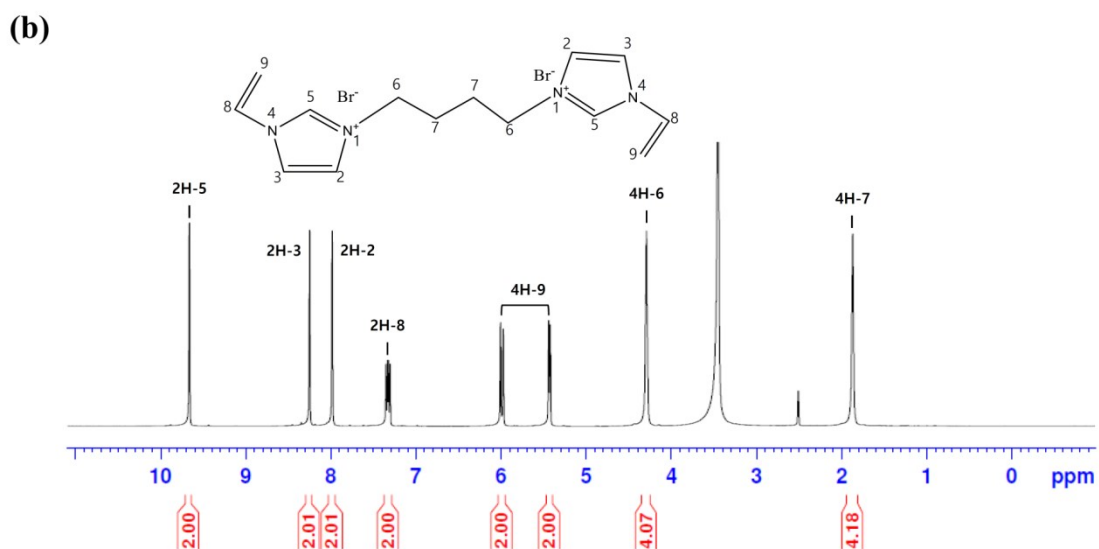

**Figure S1.** (a) Synthesis and (b)  $^1\text{H-NMR}$  spectra of cationic crosslinker (1,4-di(vinylimidazolium)butane dis-bromide; DVB).

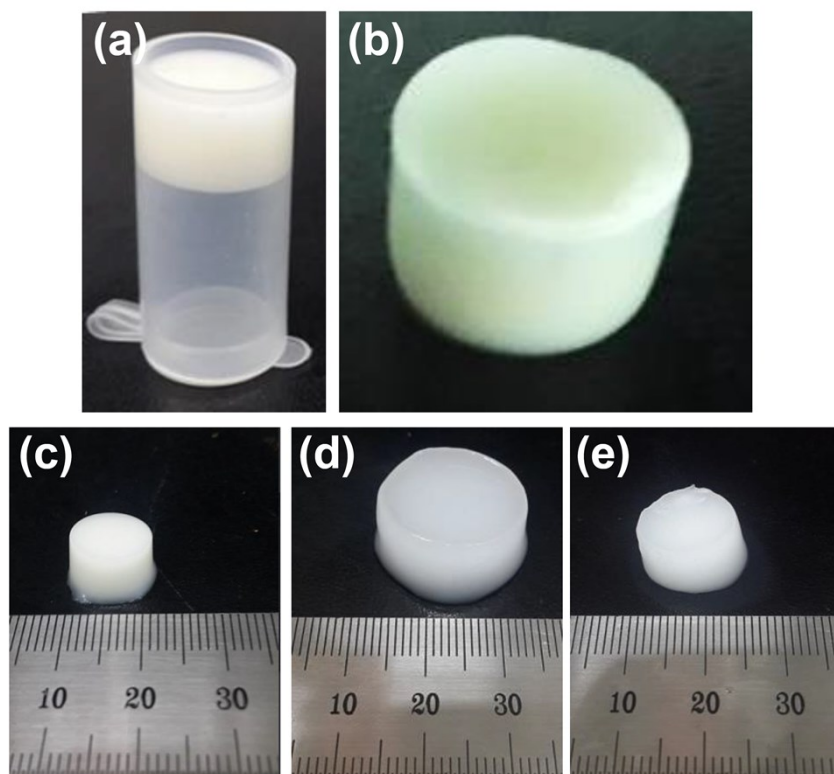

**Figure S2.** Photographs for (a, b) typical images of NIH, and demonstrating different state of MIH (b) freshly prepared hydrogel at 25 °C, (c) at equilibrium swelling (25 °C), and (d) at equilibrium shrunken state (50 °C).

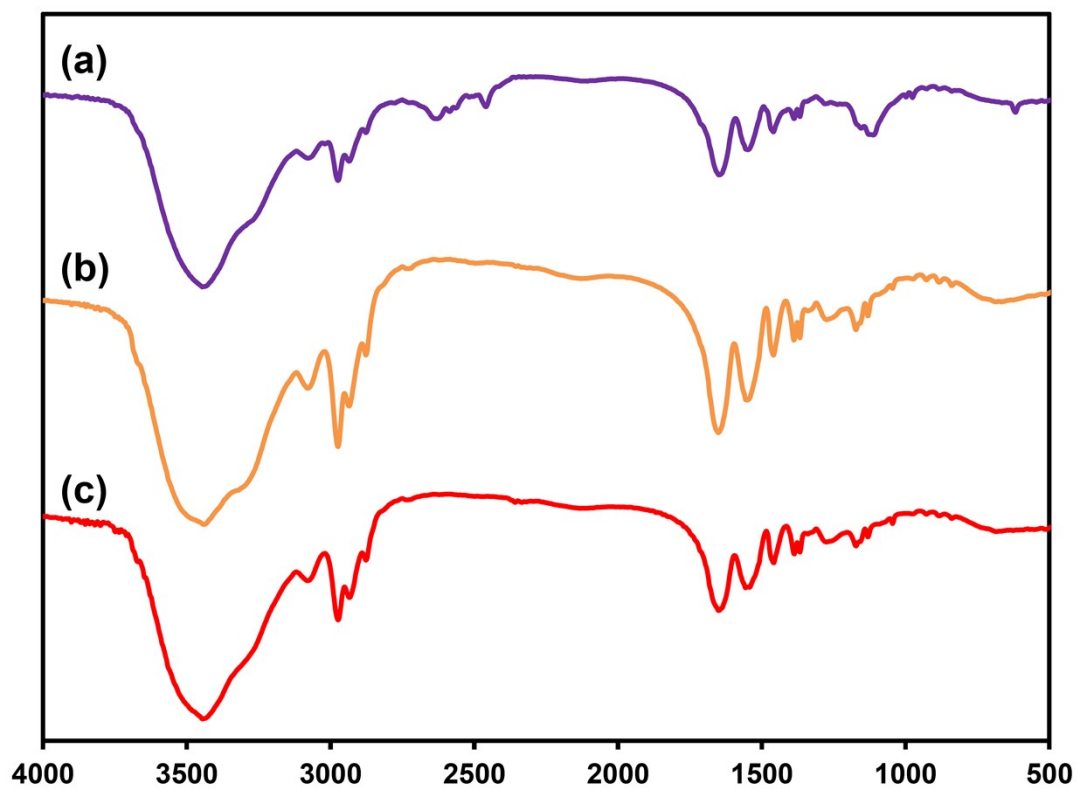

**Figure S3.** FT-IR spectra of the MIHs. (a) ACVIH, (b) DFNIH and (c) DXRIH.
